# Supplementary material for: Hierarchical three-dimensional copper selenide nanocube microelectrodes for improved carbon dioxide reduction reactions
Source: Royal Society of Chemistry journal article supplement (doi:10.1039/d1se01458g), 2021-01-01
Supplement: d1se01458g1.pdf [file d1se01458g1.pdf]

## Supporting Information

### **Hierarchical three-dimensional copper selenide nanocubes microelectrodes for improved carbon dioxide reduction reaction**

Rajasekaran Elakkiya and Govindhan Maduraiveeran\*

Materials Electrochemistry Laboratory, Department of Chemistry,  
SRM Institute of Science and Technology, Kattankulathur, Chennai, Tamil Nadu-603 203,  
India

\*Corresponding Author: E-mail: [maduraig@srmist.edu.in](mailto:maduraig@srmist.edu.in)

**Table S1.** EIS elemental values of the developed CuSe NCs-**A**|CuMEs, CuSe NCs-**B**|CuMEs,

| <i>Catalyst</i>   | <i>Potential (V)</i> | <i>R1 (ohm)</i> | <i>R2 (ohm)</i> | <i>C (mF)</i> |
|-------------------|----------------------|-----------------|-----------------|---------------|
| <i>CuSe NCs-A</i> | 1.2                  | 12.12           | 165.7           | 1.20          |
|                   | 1.4                  | 13.2            | 20.4            | 1.23          |
|                   | 1.6                  | 13.1            | 7.17            | 1.24          |
| <i>CuSe NCs-B</i> | 1.2                  | 7.81            | 50.04           | 1.42          |
|                   | 1.4                  | 8.26            | 14.7            | 1.35          |
|                   | 1.6                  | 8.24            | 4.62            | 1.37          |
| <i>CuSe NCs-C</i> | 1.2                  | 8.20            | 187.2           | 0.33          |
|                   | 1.4                  | 43.2            | 10.9            | 0.26          |
|                   | 1.6                  | 8.37            | 7.97            | 0.35          |

and CuSe NCs-**C**|CuMEs electrodes recorded in 1.0 M aqueous KHCO<sub>3</sub>.

**Table S2.** EIS elemental values of the developed CuSe NCs-**A**|CuMEs, CuSe NCs-**B**|CuMEs, and CuSe NCs-**C**|CuMEs electrodes recorded in 0.1 M [Bmim]PF<sub>6</sub>/CH<sub>3</sub>CN.

| <i>Catalyst</i>   | <i>Potential (V)</i> | <i>R1 (ohm)</i> | <i>R2 (ohm)</i> | <i>C (mF)</i> |
|-------------------|----------------------|-----------------|-----------------|---------------|
| <i>CuSe NCs-A</i> | 1.2                  | 3022            | 56.3            | 0.36          |
|                   | 1.4                  | 3726            | 56.9            | 0.13          |
|                   | 1.6                  | 1909            | 56.6            | 0.14          |
| <i>CuSe NCs-B</i> | 1.2                  | 294.1           | 19.4            | 2.02          |
|                   | 1.4                  | 119.0           | 19.15           | 2.2           |
|                   | 1.6                  | 90.7            | 19.25           | 4.1           |
| <i>CuSe NCs-C</i> | 1.2                  | 3367            | 38.2            | 0.2           |
|                   | 1.4                  | 1981            | 36.8            | 0.4           |
|                   | 1.6                  | 516.0           | 40.4            | 0.5           |

**Table S3.** List of the recently developed electrocatalysts and their CO<sub>2</sub>RR activity.

| Catalyst                          | Electrolyte                                                | Onset             | Catalytic current (mA cm <sup>-2</sup> ) | FE (%) | References |
|-----------------------------------|------------------------------------------------------------|-------------------|------------------------------------------|--------|------------|
| Cu <sub>1.63</sub> Se(1/3)        | [Bmim]PF <sub>6</sub> /CH <sub>3</sub> CN/H <sub>2</sub> O | ~-1.81 vs Ag/AgCl | ~41.5 @ -2.1 V vs. Ag/AgCl               | 77.6   | 1          |
| Pd <sub>83</sub> Cu <sub>17</sub> | [Bmim]BF <sub>4</sub>                                      | ~-1.4 vs Ag/AgCl  | -                                        | 80.0   | 2          |
| Mo-Bi BMC/CP                      | 0.5 M [Bmim]BF <sub>4</sub> MeCN                           | -                 | ~12.1 @ -0.7 V vs. RHE                   | 71.2   | 3          |
| Cu@Cu <sub>2</sub> O              | 0.1M KHCO <sub>3</sub>                                     | -                 | -                                        | 53.6   | 4          |
| Pd-SnO <sub>2</sub>               | 0.1M NaHCO <sub>3</sub>                                    | ~-0.5 vs RHE      | ~1.3 @ -0.7 V vs. RHE                    | 54.8   | 5          |
| CuSe NCs- <b>B</b>                | 0.1 M [Bmim]PF <sub>6</sub> /CH <sub>3</sub> CN            | ~-1.1 vs Ag/AgCl  | ~120.3 @ -2.0 V vs. Ag/AgCl              | 62.7   | This Work  |

BMC- bimetallic chalcogenide; CP- carbon paper.

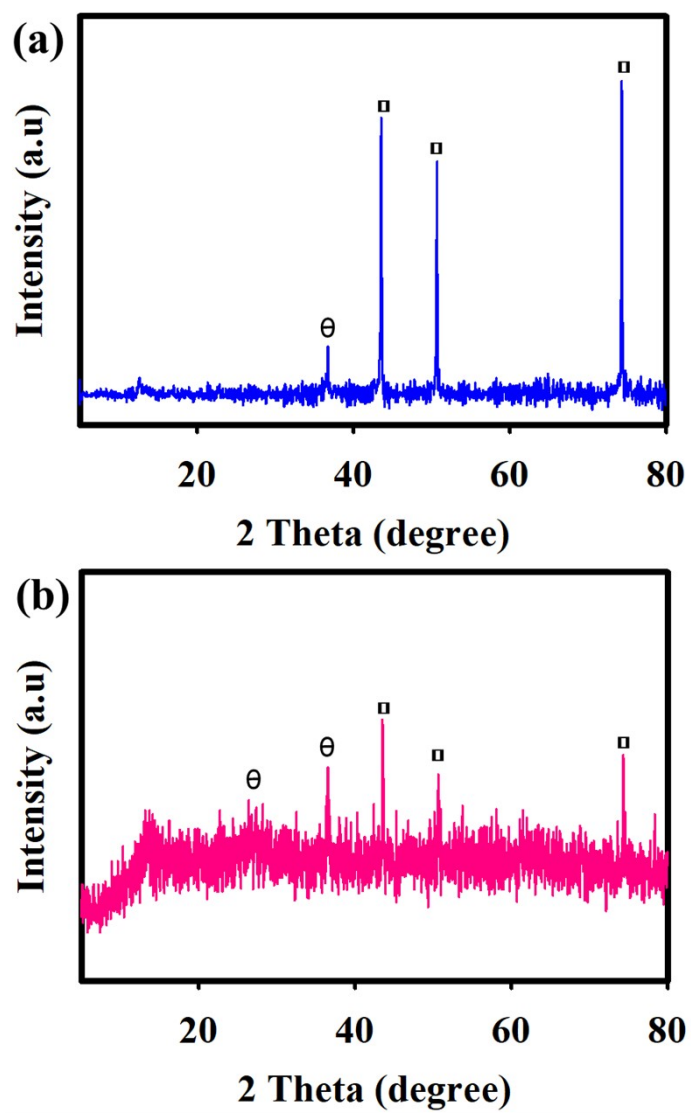

**Fig. S1.** XRD patterns of the Cu|CuMEs (a), Se|CuMEs (b) electrodes.

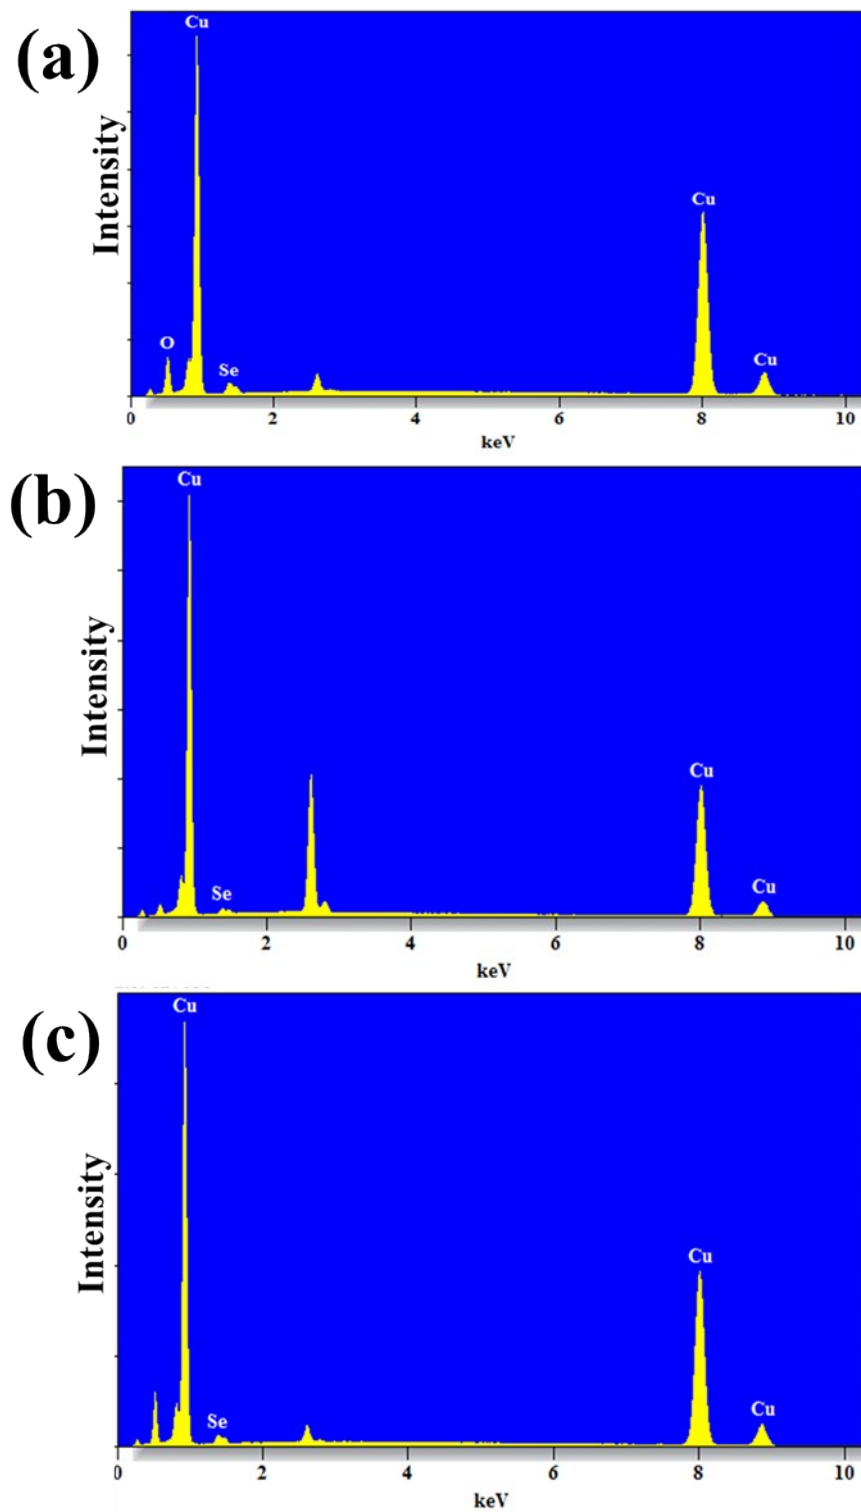

**Fig. S2.** HRSEM-EDX images of CuSe NCs-A|CuMEs (a), CuSe NCs-B|CuMEs (b), and CuSe NCs-C|CuMEs (c).

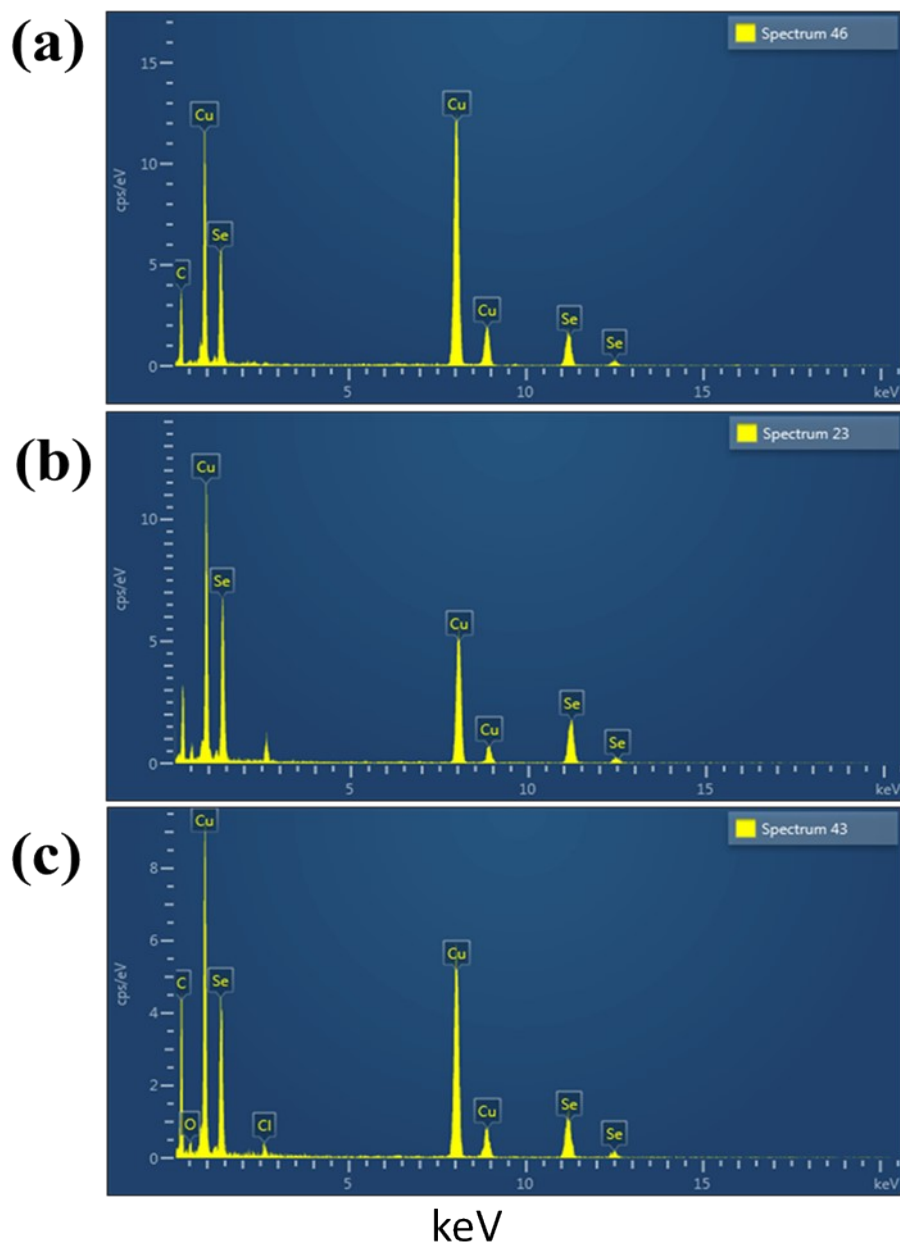

**Fig. S3.** HRTEM-EDX images of CuSe NCs-A|CuMEs (a), CuSe NCs-B|CuMEs (b), and CuSe NCs-C|CuMEs (c).

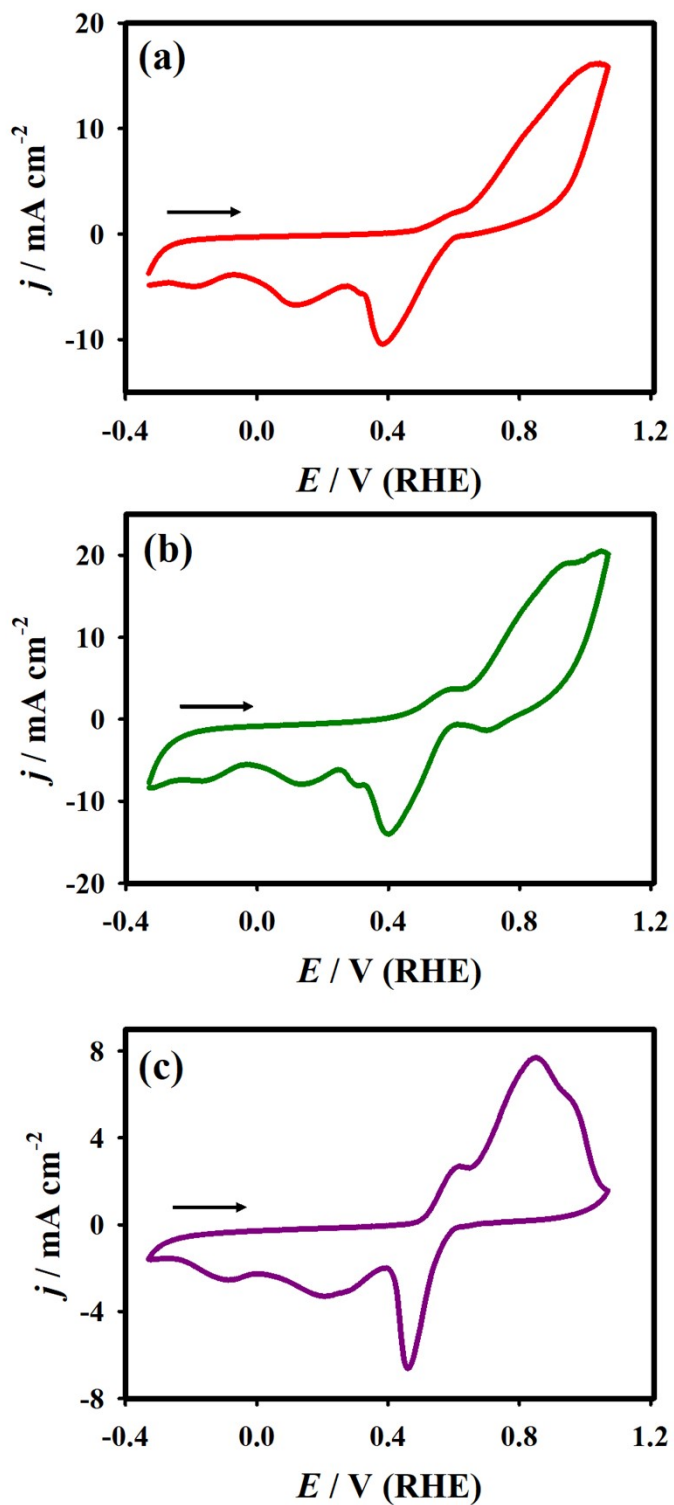

**Fig. S4.** CV curves of the CuSe NCs-A|CuMEs (a), CuSe NCs-B|CuMEs (b), and CuSe NCs-C|CuMEs (c) under  $\text{CO}_2$  saturated 1.0 M aqueous  $\text{KHCO}_3$  solution at a scan rate of  $20 \text{ mV s}^{-1}$ .



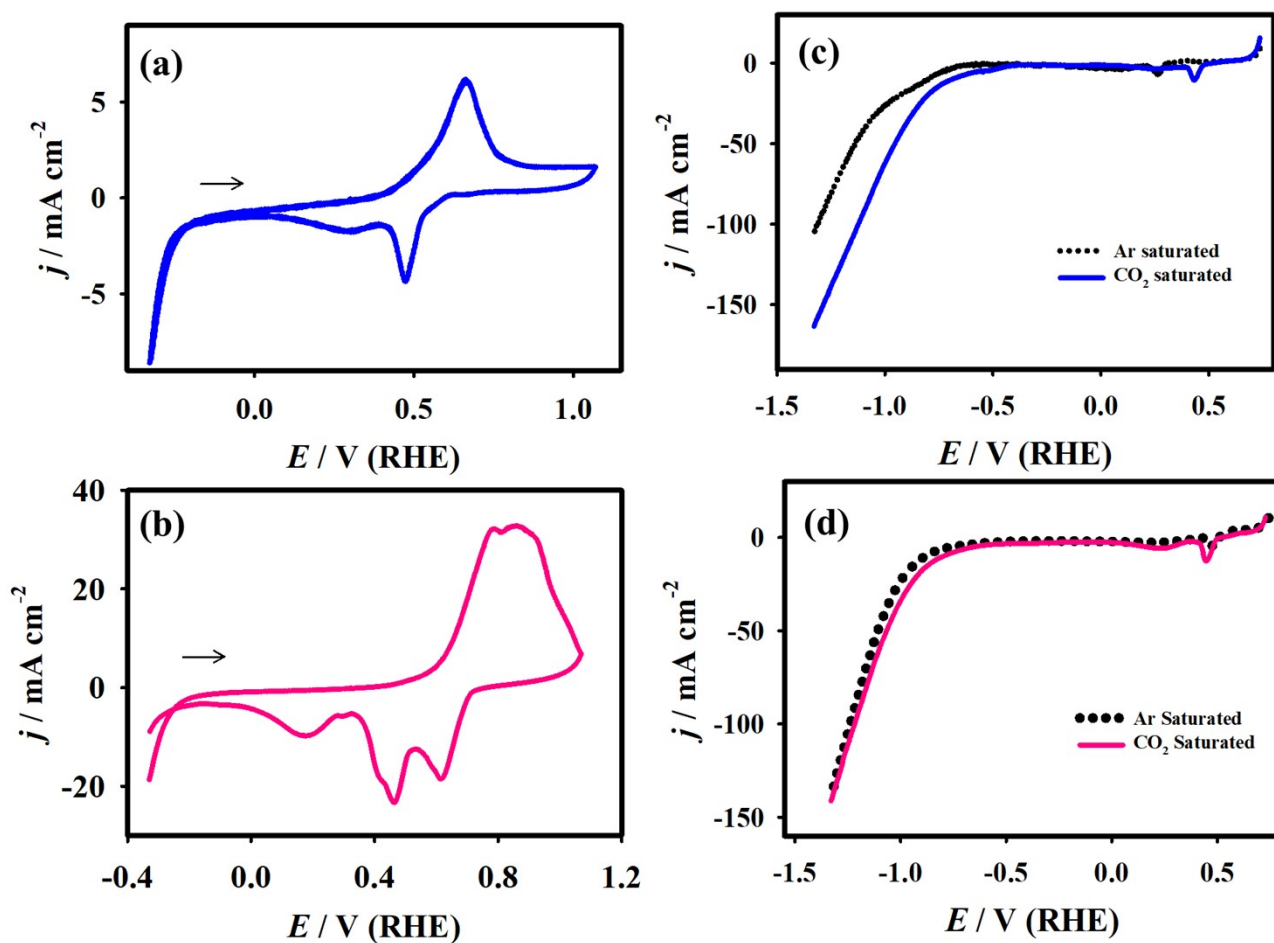

**Fig. S5.** The CV curves of Cu|CuMEs (a), Se|CuMEs (b) electrodes recorded in 1.0 M KHCO<sub>3</sub> at a scan rate of 20 mVs<sup>-1</sup>. The LSV curves of the Cu|CuMEs (c), Se|CuMEs (d) electrodes at a scan rate of 20 mV s<sup>-1</sup> in a 1.0 M KHCO<sub>3</sub> solution under Ar (dotted line) and CO<sub>2</sub> (solid line).

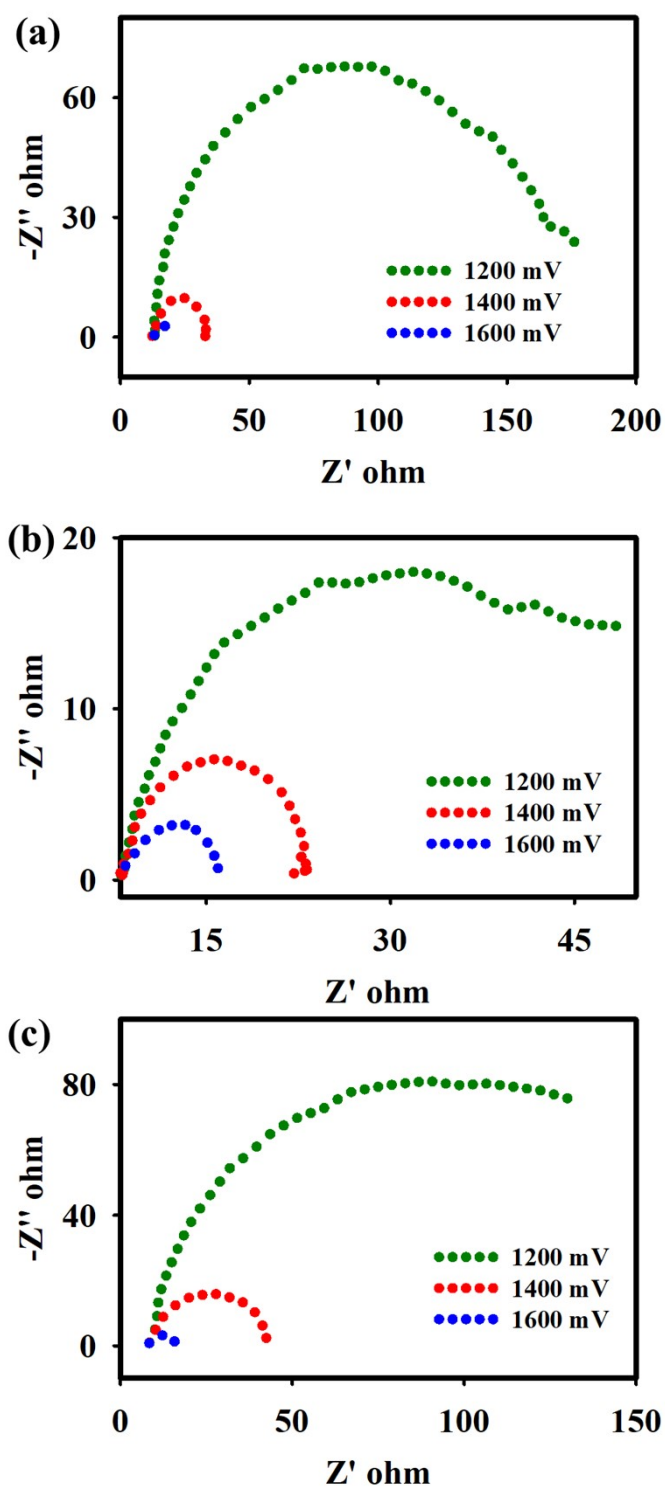

**Fig. S6.** EIS measurements of the CuSe NCs-A|CuMEs (a), CuSe NCs-B|CuMEs (b), and CuSe NCs-C|CuMEs (c) at the different applied potential under  $\text{CO}_2$  saturated 1.0 M aqueous  $\text{KHCO}_3$  solution.

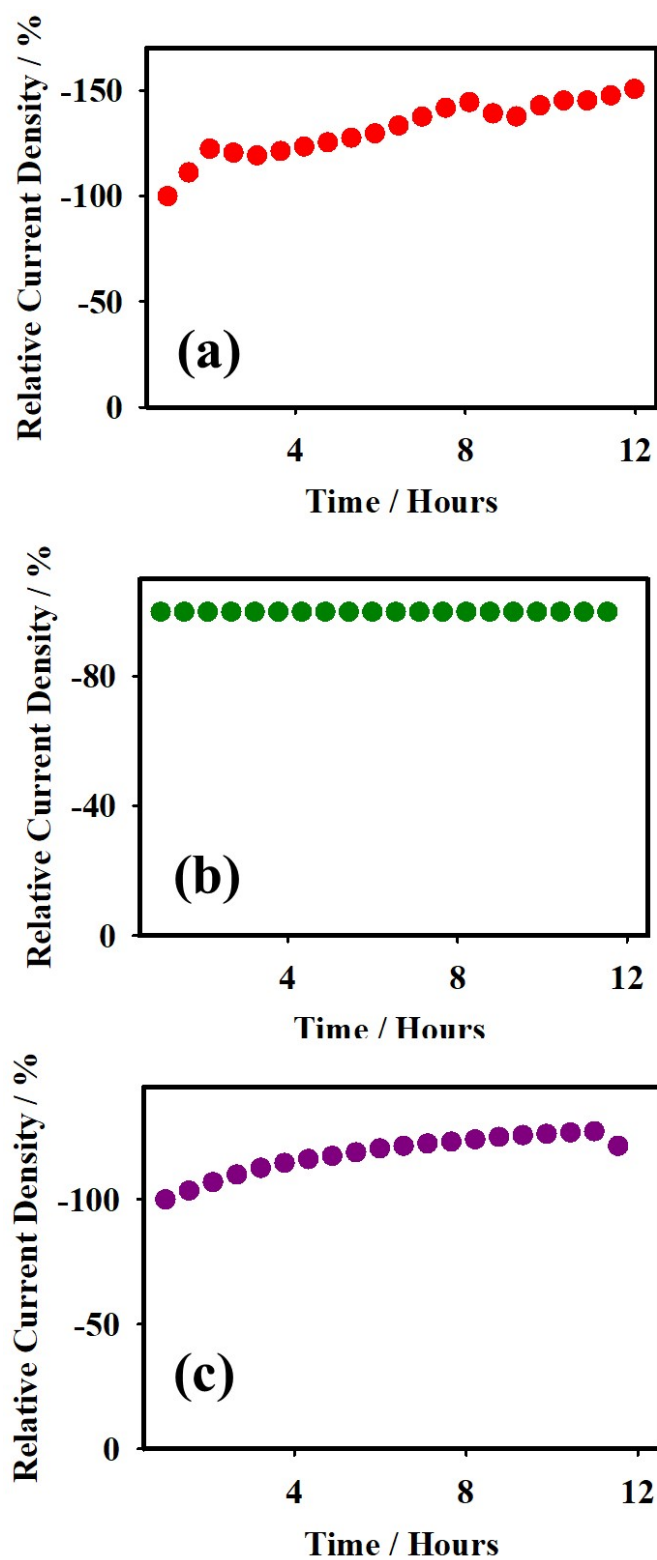

**Fig. S7.** Long term durability test for the CuSe NCs-A|CuMEs (a), CuSe NCs-B|CuMEs (b), and CuSe NCs-C|CuMEs (c) electrodes in 1.0 M aqueous  $\text{KHCO}_3$  under  $\text{CO}_2$  saturated at the constant potential of -0.93 V vs. RHE for 12 hours.

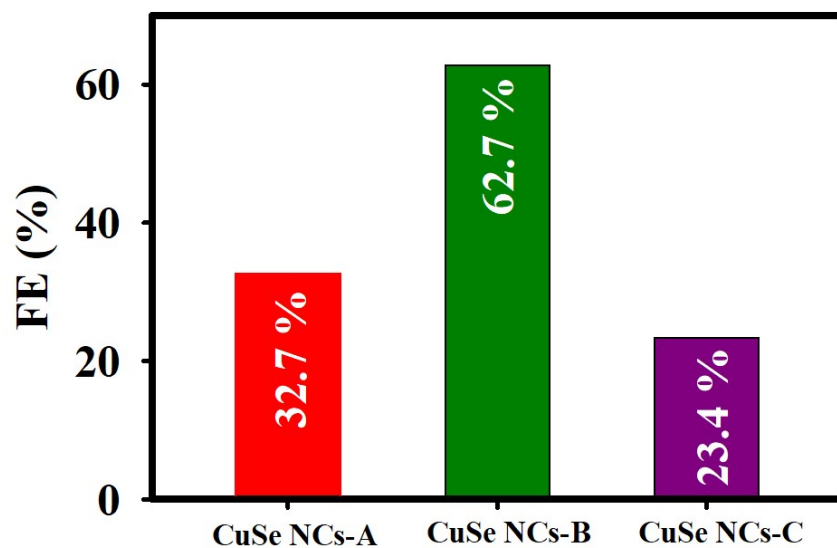

**Fig. S8** Faradaic efficiency at  $-1.6$  V (versus Ag/AgCl) under  $0.1$  M  $[\text{Bmim}]\text{PF}_6/\text{MeCN}$  at the CuSe NCs-A|CuMEs (red), CuSe NCs-B|CuMEs (green) and CuSe NCs-C|CuMEs (violet) microelectrodes.

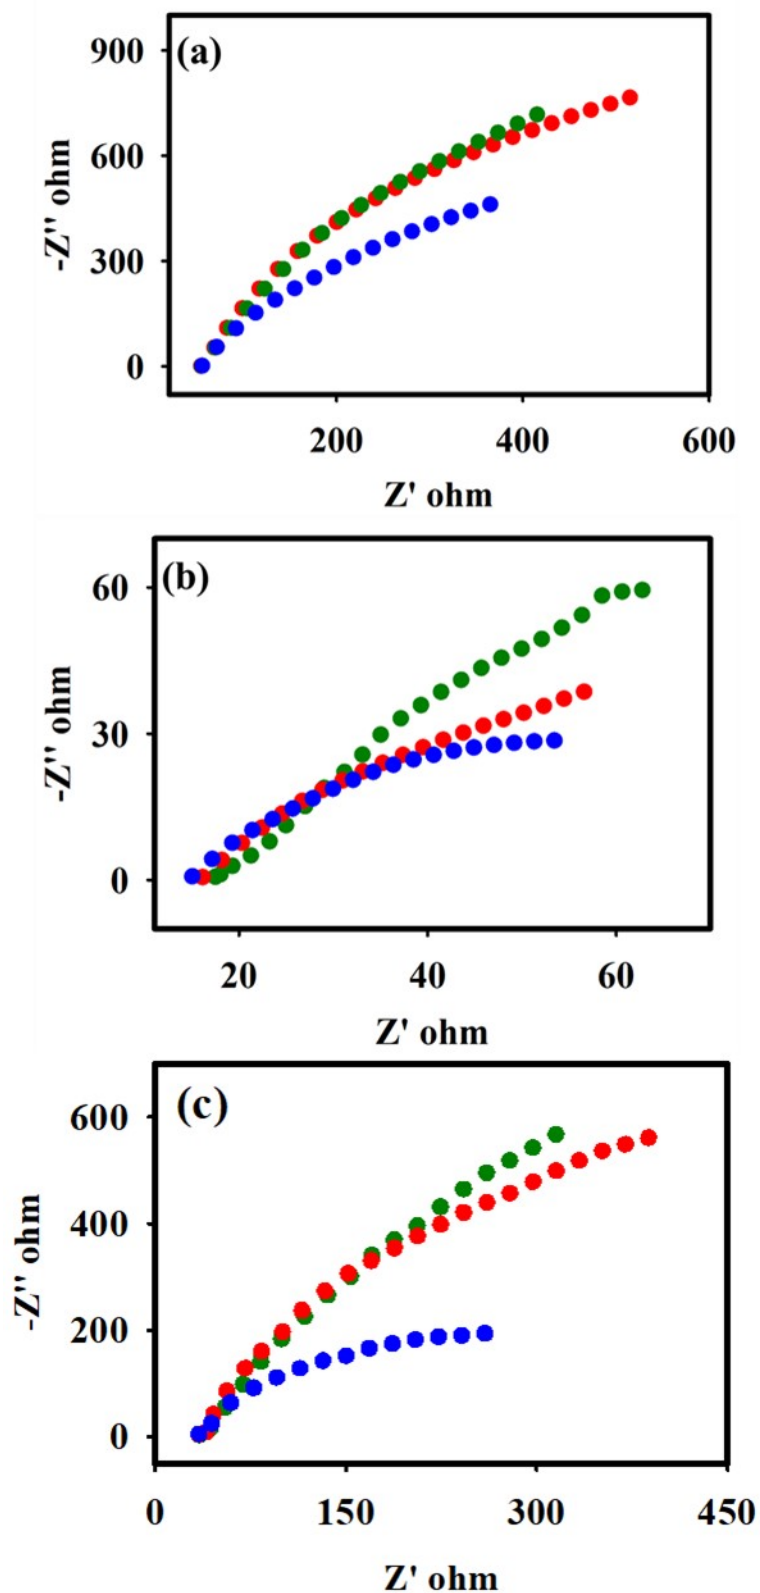

**Fig. S9.** EIS results of the CuSe NCs-A|CuMEs (a), CuSe NCs-B|CuMEs (b), and CuSe NCs-C|CuMEs (c) under CO<sub>2</sub> saturated [Bmim]PF<sub>6</sub>/MeCN at different potentials of 1.2 V (green), 1.4 V (red) and 1.6 V (blue).

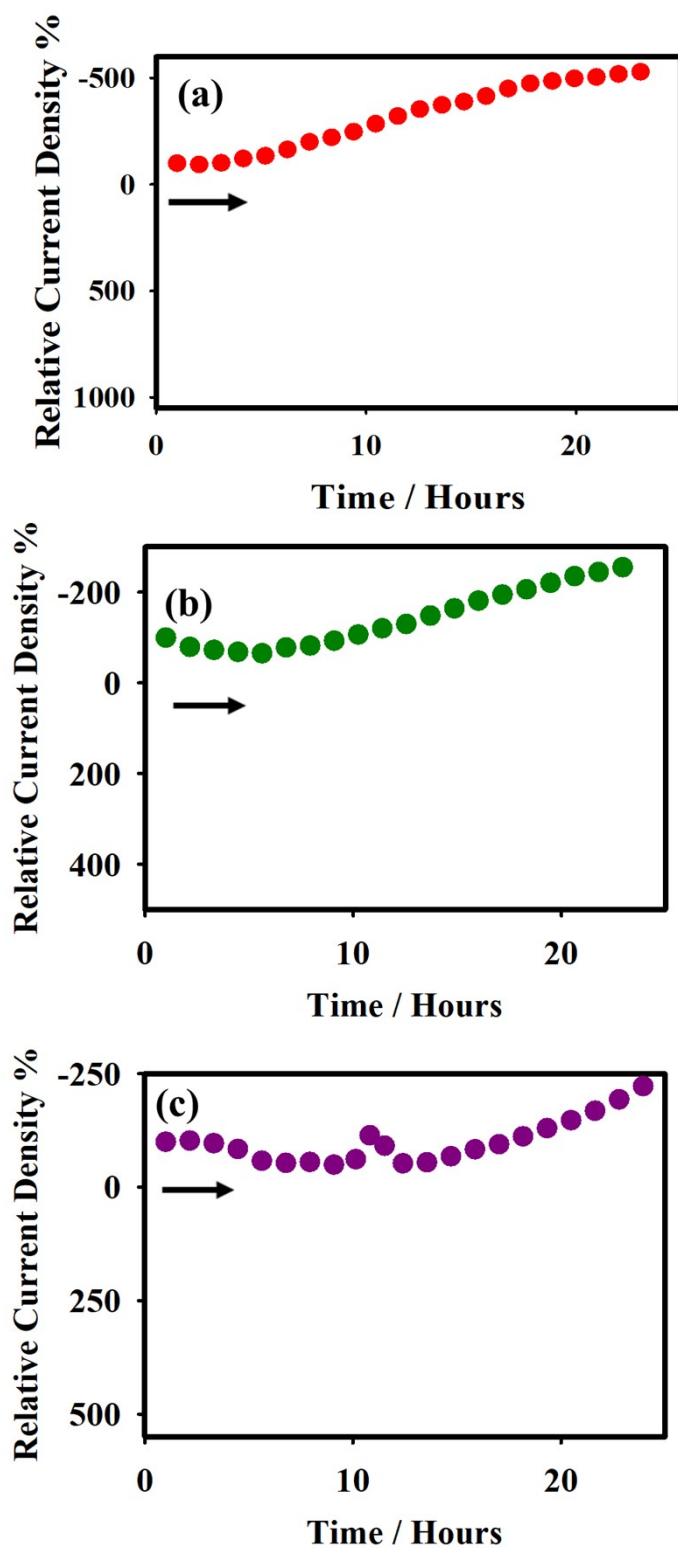

**Fig. S10.** Durability test for the CuSe NCs-A|CuMEs (a), CuSe NCs-B|CuMEs (b), and CuSe NCs-C|CuMEs (c) under CO<sub>2</sub> saturated [Bmim]PF<sub>6</sub>/MeCN at the constant potential of -1.6 V (vs. Ag/AgCl) for 24 hours.

## References

- 1 D. Yang, Q. Zhu, C. Chen, H. Liu, Z. Liu, Z. Zhao, X. Zhang, S. Liu and B. Han, *Nat. Commun.*, 2019, **10**, 677.
- 2 L. Lu, X. Sun, J. Ma, D. Yang, H. Wu, B. Zhang, J. Zhang and B. Han, *Angew. Chemie*, 2018, **130**, 14345–14349.
- 3 X. Sun, Q. Zhu, X. Kang, H. Liu, Q. Qian, Z. Zhang and B. Han, *Angew. Chemie*, 2016, **128**, 6883–6887.
- 4 X. Chang, T. Wang, Z. J. Zhao, P. Yang, J. Greeley, R. Mu, G. Zhang, Z. Gong, Z. Luo, J. Chen, Y. Cui, G. A. Ozin and J. Gong, *Angew. Chemie - Int. Ed.*, 2018, **57**, 15415–15419.
- 5 W. Zhang, Q. Qin, L. Dai, R. Qin, X. Zhao, X. Chen, D. Ou, J. Chen, T. T. Chuong, B. Wu and N. Zheng, *Angew. Chemie - Int. Ed.*, 2018, **57**, 9475–9479.
